1 **Title**

2 X-ray phase contrast imaging of *Vitis* spp. buds shows freezing pattern and correlation  
3 between volume and cold hardiness

4  
5 **Running Title**

6 X-ray phase contrast imaging of *Vitis* spp. buds to study freezing

7  
8 **Authors**

9 Alisson P. Kovaleski<sup>1,2\*</sup>, Jason P. Londo<sup>1,2\*</sup>, and Kenneth D. Finkelstein<sup>3</sup>

10

11 <sup>1</sup> School of Integrative Plant Science – Horticulture Section, Cornell University – New  
12 York State Agricultural Experiment Station, 15 Castle Creek Drive, Geneva, New York,  
13 USA.

14

15 <sup>2</sup> United States Department of Agriculture, Agricultural Research Service, Grape  
16 Genetics Research Unit, 15 Castle Creek Drive, Geneva, New York, USA.

17

18 <sup>3</sup> Cornell High Energy Synchrotron Source, Cornell University, Ithaca, New York, USA

19

20 \* Corresponding authors

21 APK – e-mail: ap874@cornell.edu; phone: (315) 787-2484

22 JPL – e-mail: jason.londo@ars.usda.gov; phone: (315) 787-2463

23 **Date of submission:** DD MMM 2019

24 **Number of figures:** 6

25 **Number of supplementary figures:** 1

26 **Number of supplementary videos:** 3

27 **Total word count:** 5449

28

29 **X-ray phase contrast imaging of *Vitis* spp. buds reveals freezing pattern and**  
30 **correlation between volume and cold hardiness**

31

32 **Highlight**

33 X-ray phase contrast imaging shows freezing occurs over several minutes and  
34 propagates from center toward tip of *Vitis* spp. buds. Incremental increase in bud  
35 volume correlates with cold deacclimation.

36

37

38 **Abstract**

39 Grapevine (*Vitis* spp.) buds must survive winter temperatures in order to resume growth  
40 when suitable conditions return in spring. They do so by developing cold hardiness  
41 through deep supercooling, but the mechanistic process of supercooling in buds  
42 remains largely unknown. Here we use synchrotron X-ray phase contrast imaging to  
43 study cold hardiness-related characteristics of *V. amurensis*, *V. riparia*, and *V. vinifera*  
44 buds: time-resolved 2D imaging was used to visualize freezing; and microtomography  
45 was used to evaluate morphological changes during deacclimation. Bud cold hardiness  
46 was determined (low temperature exotherms; LTEs) using needle thermocouples during  
47 2D imaging as buds were cooled with a N<sub>2</sub> gas cryostream. Resolution in 2D imaging  
48 did not allow for ice crystal identification, but freezing was assessed due to movement  
49 of tissues coinciding with LTE values. Freezing was observed to propagate from the  
50 center of the bud toward the outer bud scales. The freezing events observed lasted  
51 several minutes. Additionally, loss of supercooling ability appears to be correlated with  
52 increases in bud tissue volume during the process of deacclimation, but major increases  
53 in volume occur after most of the supercooling ability is lost, suggesting growth  
54 resumption processes are limited by deacclimation state.

55

56

57 **Keywords**

58 Buds; cold hardiness; deacclimation; freezing; microtomography; supercooling; *Vitis*  
59 spp.; X-ray phase contrast.

## 60 Introduction

61 Grapevines (*Vitis* spp.) produce compound mixed buds that contain both  
62 vegetative and reproductive tissue in a primary bud, and vegetative tissue in secondary  
63 and tertiary buds (Pratt, 1971). These buds are produced during the growing season,  
64 and transition into a dormant state to survive unsuitable growth conditions, such as  
65 drought or low temperature. Throughout the winter, grapevine buds will remain dormant  
66 and develop cold hardiness in order to prevent damage from low temperatures. Winter  
67 dormancy status is transitional, subtly changing from an endodormant to ecodormant  
68 status. During endodormancy, buds are recalcitrant to growth due to unknown internal  
69 repression. However, upon progressive chill accumulation, buds become ecodormant  
70 and will resume growth if exposed to permissive conditions (Lang *et al.*, 1987).

71 Growth resumption under forcing conditions, marked by the appearance of  
72 budbreak, is typically used to evaluate the changes in dormancy level that occur during  
73 winter (e.g., Londo and Johnson, 2014; Londo and Kovaleski, 2019). However, this  
74 comparison of phenological stage is dependent on comparable development between  
75 genotypes or species: if growth and expansion in the bud during dormancy release is  
76 not the same in all genotypes, we could incorrectly describe the relationship of cold  
77 hardiness and budbreak phenology. For example, phenological scales for budbreak in  
78 grapevine are based on observations of *V. vinifera* buds (Coombe and Iland, 2005;  
79 Andreini *et al.*, 2009) and may incorrectly describe changes that occur in wild species.  
80 Recently, this dormancy transition has been shown to be observed through the gradual  
81 increase in rate of cold hardiness loss that occurs with chill accumulation over the winter  
82 season (Kovaleski *et al.*, 2018). However, the relationship between the kinetics of the  
83 deacclimation process and budbreak is different for species within *Vitis*: buds of  
84 cultivated grapevine (*V. vinifera*) only begin showing a budbreak phenotype after the  
85 majority of the supercooling ability is lost, whereas buds of *V. riparia* may present  
86 budbreak prior to fully losing their cold hardiness (Kovaleski *et al.*, 2018). Therefore,  
87 exploring differences in morphological aspects of *Vitis* species buds during  
88 deacclimation may elucidate important differences in time to budbreak and its relation to  
89 deacclimation kinetics.

90           While the majority of methods for studying bud morphology is destructive (e.g.,  
91 sectioning), non-destructive methods may give better insight into how the  
92 developmental process of early budbreak affects the perception of phenological  
93 progression. Tomography imaging is an underused technique in plant sciences  
94 (Staedler *et al.*, 2013) that may be an alternative for the study of morphological  
95 differences between buds. This technique has recently become a consolidated method  
96 for the study of xylem and wood characteristics (Mayo *et al.*, 2010; Sedighi Gilani *et al.*,  
97 2014; Cochard *et al.*, 2015; Torres-Ruiz *et al.*, 2015; Choat *et al.*, 2016; Malek *et al.*,  
98 2016; Nardini *et al.*, 2017; Scoffoni *et al.*, 2017; Koddenberg and Miltz, 2018), but other  
99 plant structures have also been imaged, such as developing maize seeds (Rousseau *et*  
100 *al.*, 2015), tomato leaves (Verboven *et al.*, 2015), and flowers and floral buds (Staedler  
101 *et al.*, 2013; Tracy *et al.*, 2017).

102           In higher latitudes, the dormant buds of woody species experience temperatures  
103 below the freezing point of water during the winter, and as a consequence have  
104 developed strategies to prevent bud death. Grapevine buds, as well as other woody  
105 perennials, survive these low temperatures and gain cold hardiness by promoting the  
106 supercooling of water in tissues (Burke *et al.*, 1976; Andrews *et al.*, 1984; Quamme,  
107 1995). Through this process, pure water can remain liquid to temperatures close to  $-42$   
108  $^{\circ}\text{C}$  (Bigg, 1953). If the bud cold hardiness threshold is surpassed by low temperatures,  
109 bud mortality ensues, impairing growth and flowering in the following season. Maximum  
110 cold hardiness limits are different for different species, ranging from high negative  
111 temperatures (i.e.,  $-7$   $^{\circ}\text{C}$ ) to very close to the  $\sim -42$   $^{\circ}\text{C}$  supercooling limit (Quamme,  
112 1995). Within grapevines, bud cold hardiness changes throughout the winter, primarily  
113 driven by changes in air temperature (Ferguson *et al.*, 2011, 2014; Londo and  
114 Kovalski, 2017; Kovalski *et al.*, 2018) and there is variation among species and  
115 cultivars within a species. Maximum cold hardiness has been observed to be mostly  
116 between  $-24$   $^{\circ}\text{C}$  and  $-35$   $^{\circ}\text{C}$  (Andrews *et al.*, 1984; Ferguson *et al.*, 2011, 2014; Londo  
117 and Kovalski, 2017), with cultivated varieties being less cold hardy than wild species.  
118 Although low temperatures are the most limiting factor in plant distribution (Parker,  
119 1963), the process through which plants control the supercooling point of buds and  
120 other structures remains largely unknown.

121           Damage in grapevine buds when supercooling fails is hypothesized to occur from  
122 the formation of intracellular ice (Andrews *et al.*, 1984; Mills *et al.*, 2006), however  
123 location of ice nucleation has not been studied in grapevines. The observation of the  
124 freezing process is the best means for understanding how the event causes damage  
125 (Molisch, 1897) and the identification of regions of the bud where supercooling fails can  
126 help understanding how plants control supercooling. Multiple techniques have been  
127 used to observe or infer ice formation in food and biological samples: indirect  
128 observation through freeze-substitution, identifying holes left in tissues by ice  
129 (Bevilacqua *et al.*, 1979); light microscopy (Molisch, 1897; Morris *et al.*, 1986; Guenther  
130 *et al.*, 2006; Stott and Karlsson, 2009; Endoh *et al.*, 2009, 2014); fluorescence  
131 microscopy with the aid of a microslicer for 3D ice structure (Do *et al.*, 2004); NMR  
132 microscopy (Ishikawa *et al.*, 1997; Kerr *et al.*, 1998); freeze fracture Cryo-SEM (Endoh  
133 *et al.*, 2009, 2014); infrared imaging (Wisniewski *et al.*, 1997; Workmaster and Palta,  
134 1999; Bauerecker *et al.*, 2008; Livingston *et al.*, 2018; Neuner *et al.*, 2019); and  
135 confocal laser scanning microscopy (Baier-Schenk *et al.*, 2005). In plants, Endoh *et al.*  
136 (2009) used light microscopy to examine extracellular ice crystals and freeze fracture  
137 Cryo-SEM to evaluate the presence of intracellular ice, based on the presence of  
138 crystalline ice vs. amorphous ice inside cells in buds of larch (*Larix kaempferi*). These  
139 methods, however, do not allow for temporal imaging of ice fronts. Using time-resolved  
140 X-ray phase contrast imaging, Sinclair *et al.* (2009) observed the growth of ice crystals  
141 in insect larvae in real time. X-ray phase contrast imaging of freezing appears to be an  
142 interesting option for imaging freezing in buds, considering the opaque nature of the  
143 structure, as well as the fact that it allows for temporal imaging of ice spreading (Sinclair  
144 *et al.*, 2009).

145           Understanding morphological changes within buds during deacclimation, as well  
146 as where freezing occurs may provide new insights into dormancy release and plant  
147 control over supercooling ability. Therefore, the objective of this study was to evaluate  
148 morphological development of buds from different *Vitis* species during loss of hardiness  
149 and budbreak, and image the freezing of buds to identify regions of the bud where the  
150 supercooling mechanism fails using X-ray phase contrast imaging.

151

## 152 **Materials and Methods**

### 153 *Plant material and cold hardiness*

154 Buds of *V. amurensis* PI588641, *V. riparia* PI588711, and *V. vinifera* 'Riesling'  
155 were collected from the field on 31 January 2018, prepared into single node cuttings  
156 and placed in a 4 °C cold room in cups of water. In preparation for imaging, sets of buds  
157 were removed from the cold room and placed under forcing conditions (22 °C, 16h/8h  
158 light/dark) periodically to deacclimate. Buds were removed on 31 Jan, 2 Feb, 5 Feb, 7  
159 Feb, and 11 Feb 2018 for *V. riparia* and *V. vinifera*; and 8 Feb and 11 Feb 2018 for *V.*  
160 *amurensis*. On 13 Feb 2018, cold hardiness of buds was determined and buds were  
161 moved back into cold room (4 °C), where they were maintained throughout the imaging  
162 period to minimize changes in cold hardiness and developmental stage (Kovaleski *et*  
163 *al.*, 2018). This sampling scheme provided us with buds at 0, 2, 6, 8, 11, and 13 days of  
164 deacclimation for *V. riparia* and *V. vinifera*, and 0, 2, 5 days for *V. amurensis*.

165 Cold hardiness was determined through differential thermal analysis (DTA), as  
166 represented by individual low temperature exotherm (LTE) of buds (Mills *et al.*, 2006). In  
167 summary, buds are excised from cane and placed on thermoelectric modules (TEM) in  
168 plates, which are then placed in a programmable freezer. The freezer is cooled at -4 °C  
169 hour<sup>-1</sup>, and changes in voltage due to release of heat by freezing of water is measured  
170 by the TEMs and recorded via Keithley data logger (Tektronix, Beaverton, OR) attached  
171 to a computer. Deacclimation rates were estimated using linear regression (Kovaleski *et*  
172 *al.*, 2018) using R (ver. 3.3.0, R Foundation for Statistical Computing). R was also used  
173 to produce all plots.

174

### 175 *X-ray phase contrast imaging*

176 Buds attached to a piece of cane were held on a custom-made cylindrical holder  
177 with mounting putty. The holder was attached to a small goniometer mounted on a  
178 Huber 4-circle diffractometer. Imaging was performed in the C-line at the Cornell High  
179 Energy Synchrotron Source (CHESS, Cornell University, Ithaca, USA). The  
180 monochromatic beam was expanded to 7 mm × 7 mm at X-ray energy 15 KeV. The  
181 sample-detector distance used was optimized to 0.5 m. Phase-contrast is produced  
182 when majority unperturbed beam interferes with angular deviations in the wavefront

183 caused by density variations in the sample (Socha *et al.*, 2007). X-rays were converted  
184 into visible light using a rare-earth doped GGG ( $\text{Gd}_3\text{Ga}_5\text{O}_{12}$ ) crystal plate and imaged  
185 using an Andor Neo CMOS camera with a 5x objective lens.

186 For morphological changes in buds, tomographic-like imaging was performed  
187 with camera resolution of approximately 5  $\mu\text{m}$ , obtained by adapting the objective lens.  
188 Buds were scanned while rotating over 180°, with images collected every  $\frac{1}{4}$  or  $\frac{1}{2}$   
189 degree. Reconstruction of bud structure based on these datasets was performed using  
190 Octopus Reconstruction software (ver. 8.8.1, Inside Matters, Belgium). After  
191 reconstruction, buds were visualized in 3D using OsiriX imaging software (ver. 8.0.1,  
192 Pixmeo, Switzerland). For volume measurements, a threshold was visually established  
193 for each bud to remove noise. The bud cushion (i.e., undifferentiated tissue connecting  
194 bud to shoot) was removed from the image, and only the bud itself was used. Volume  
195 was determined by counting the number of voxels in the 3D image using the ROI tool  
196 within OsiriX. Volume was observed as percent increase in volume ( $\Delta V$ ) from the  
197 sample in day 0. If more than one bud was imaged for day 0, the average volume of  
198 samples was used as the base value.

199 Freezing of the buds was observed using 2D time-lapse imaging with images at 2  
200  $\mu\text{m}$  pixel size. A 1 second exposure was used, but image capturing time effectively  
201 resulted in 0.56 Hz frequency. During the imaging, buds were cooled using a  $\text{N}_2$  gas  
202 cryostream (Oxford Cryosystems, UK), with a cooling rate of  $\sim -40$   $^\circ\text{C}$   $\text{hour}^{-1}$ . A  
203 thermocouple in a 33-gage needle probe (Omega Engineering, Inc., USA) was inserted  
204 in the bud during imaging and used to measure the temperature inside the bud, and  
205 temperature measurements were recorded using an RDXL4SD data logger (Omega  
206 Engineering, Inc., USA). LTEs for these samples were observed as temperature  
207 deviations from the linear rate of cooling. Contraction of the mounting putty due to  
208 cooling resulted in a slow downward drift of the bud, therefore image sets were aligned  
209 using the Linear Stack Alignment with SIFT plugin  
210 ([https://imagej.net/Linear\\_Stack\\_Alignment\\_with\\_SIFT](https://imagej.net/Linear_Stack_Alignment_with_SIFT); Lowe, 2004) in Fiji (ImageJ ver.  
211 2.0.0; Schindelin *et al.*, 2012), and then cropped to remove black edges. Kymographs  
212 were obtained from the aligned image stacks using Fiji. To evaluate changes in buds  
213 over time, multi-scale structural similarity (MS SSIM) index (Wang *et al.*, 2004) was

214 quantified between each image and the initial image using the MS SSIM index plugin  
215 (<https://imagej.nih.gov/ij/plugins/mssim-index.html>) in Fiji. To compare different regions  
216 of the buds, MS SSIM index values were normalized to a maximum of 100% and  
217 minimum of 0%. Image stacks were transformed into videos using Fiji, and temperature  
218 and image information were matched using time stamps in data-logger and images,  
219 inserted using the *Series Labeler* plugin ([https://imagej.net/Series\\_Labeler](https://imagej.net/Series_Labeler)). The time  
220 required to image buds for 3D scans and freezing scans limited the number of samples.

221

## 222 **Results**

223 Deacclimation of the buds was well described by linear behavior until the limits of  
224 detection of LTEs (Fig. 1). *V. amurensis* and *V. riparia* had similar deacclimation rates,  
225 at 2.24 °C day<sup>-1</sup> (R<sup>2</sup>= 0.89) and 2.12 °C day<sup>-1</sup> (R<sup>2</sup>= 0.92), respectively. *V. vinifera* had a  
226 lower deacclimation rate, at 1.33 °C day<sup>-1</sup> (R<sup>2</sup>= 0.95). LTEs determined using needle  
227 probes inserted in the buds during imaging of freezing produced similar results to those  
228 using the regular DTA method. In *V. riparia*, the last two time points were not used for  
229 rate determination as buds had already started to open.

230 Both the vegetative and reproductive aspects of the mixed *Vitis* bud structure  
231 were visible in micro-CT imaging (Figs. 2–4). As a consequence of faster deacclimation  
232 and development, *V. riparia* buds were imaged through a wider range of developmental  
233 stages (Fig. 2) than *V. vinifera* (Fig. 3). *V. riparia* was imaged in E-L stages 1 – “winter  
234 bud” (Fig. 2A–C), 2 – “bud scales opening” (Fig 2D), and 3 – “wooly bud” (Fig 2E). *V.*  
235 *vinifera* buds have an outer appearance of E-L stage 1 in Figs. 3A–C, and is at an early  
236 stage 2 in Figure 3D. With a reduced number of sampling dates, *V. amurensis* buds  
237 were all at E-L stage 1 and had the lowest range of development imaged (Fig. 4).  
238 Primary, secondary, and tertiary buds are visible in the still images shown for all three  
239 species. Images provide clear identification of inflorescences in the primary bud, even in  
240 the fully dormant state (day 0; Figs. 2A, 3A, 4A).

241 Clear morphological differences can be seen when comparing buds of the  
242 different species. *V. riparia* buds are much smaller than *V. vinifera* and *V. amurensis*.  
243 The inflorescence primordia in *V. riparia*, however, take up much more of the volume of  
244 day 0 buds in *V. riparia* than in *V. vinifera*. Both *V. vinifera* and *V. riparia* have



245 inflorescence primordia of ~0.5 mm, whereas in *V. amurensis* they are ~1mm long and  
246 appear more developed. Buds of *V. vinifera* have much more space between the leaf  
247 primordia, inflorescence primordia, and the outer bud scales compared to the two other  
248 species, especially *V. amurensis*. This space is occupied by “wool” or “hair”, most  
249 visible in Figs. 1B and C. *V. amurensis* buds are very compact at the dormant stage,  
250 and there is very little space between the scales and leaf primordia, which can be seen  
251 folding down on the top, as if constrained by the outer scales (Fig. 4A).

252 In *V. riparia*, there are very little differences in morphology between the buds until  
253 day 8 (Figs. 2A–C). However, once LTE values were above  $-10\text{ }^{\circ}\text{C}$  (close to the limit of  
254 detection where HTEs and LTEs may combine in DTA; Figure 1) , a noticeable increase  
255 in the bud size can be observed (Figs. 2D and E, 5). Much of this change appears to be  
256 due to the expansion and development of the inflorescence primordia, and elongation of  
257 the base of the primary bud (shoot). In *V. vinifera*, the inflorescence primordia appear to  
258 remain the same size as the buds lose hardiness but there is a noticeable expansion of  
259 the base of the primary bud. In *V. amurensis*, there are no clear internal differences  
260 seen between day 0 and 5.

261 The visual assessments of expansion in bud tissues are confirmed by analysis of  
262 the volume of tissue ( $\Delta V$ ) in the buds (Fig. 5). *V. riparia* buds reached the greatest  
263 expansion in volume within the time analyzed, reaching at day 13 almost triple the size  
264 of buds in day 0. *V. amurensis* appears to have a similar slope when the first days are  
265 considered compared to *V. riparia*, while *V. vinifera* has the slowest increase in bud  
266 volume. Both *V. riparia* and *V. vinifera* buds had increased ~50% in volume when most  
267 of the hardiness was lost (day 8 and day 13, respectively), although the rate of volume  
268 increase is much higher after all cold hardiness is lost for *V. riparia* (day 8-13).  
269 Pearson’s correlation for LTE and  $\Delta V$  for *V. amurensis*, *V. riparia* and *V. vinifera* are  
270 0.94, 0.96 and 0.96, respectively.

271 Freezing of the buds occurred from the inside-out (Fig. 6, Supplementary Figure  
272 S1, Supplementary Videos S1–S3). The videos are produced based on projection  
273 images that show the accumulated structure of buds (Fig. 6A – same bud as in Fig. 2D).  
274 Freezing in this *V. riparia* bud is observed at  $-9.4\text{ }^{\circ}\text{C}$  / 28:41 mm:ss (Supplementary  
275 Video S1). In a kymograph taken through the mid-section of the bud, an expansion of

276 tissues is visualized by the drift outward in the structures (Fig. 6B). When aligning the  
277 MS SSIM and temperature probe data (Figs. 6C and D), we observe that there is a slow  
278 decay in MS SSIM during the initial cool down. The fastest decay in MS SSIM occurs  
279 simultaneously with the recording of increase in temperature due to heat release of  
280 water freezing. When comparing a top section with a bottom section of the bud, the MS  
281 SSIM index decays to a minimum value earlier than in the top (Fig. 6C inset). In a *V.*  
282 *amurensis* bud from day 0 (Fig. 4A), freezing of the primary bud occurred at  $-17.5\text{ }^{\circ}\text{C}$   
283 [Supplementary Figure S1; Supplementary Video S2 (time-stamp 32:10)]. The freezing  
284 resulted in an increase in the inner temperature of the bud of  $\sim 8\text{ }^{\circ}\text{C}$ , reaching  $-9.4\text{ }^{\circ}\text{C}$ . A  
285 much smaller increase in temperature occurs at 39:14, caused by the freezing of  
286 secondary bud. Evaluation of MS SSIM shows similar results in *V. amurensis*  
287 (Supplementary Figure S1). Detection of freezing in *V. vinifera* was subtler, with a very  
288 slight expansion of the center portion of the bud [Supplementary Video S3 ( $-18.3\text{ }^{\circ}\text{C}$  /  
289 33:30)]. The movement of tissues that signals freezing can be observed occurring over  
290 minutes in all genotypes: between 28:41 and  $\sim 34:00$  in *V. riparia*, 32:10 to  $\sim 41:00$  in *V.*  
291 *amurensis*, and 33:30 to  $\sim 36:00$  in *V. vinifera*.

292

## 293 **Discussion**

294 Only recently has X-ray microtomography begun to be used for the exploration of  
295 floral development in annual plants (Tracy *et al.*, 2017 and referencing papers), but here  
296 we demonstrate the use of this technique to study morphological changes in buds of  
297 woody perennials. More importantly, we used quantitative data derived from  
298 tomography scans to explore concepts related to cold hardiness, and X-ray phase  
299 contrast imaging to visualize freezing. We demonstrate that small gains in volume occur  
300 during deacclimation, but increases are much faster once most of the supercooling  
301 ability of buds is lost, suggesting that the supercooled state in some way limits growth  
302 and development in dormant grapevine buds. Although the freezing method and rate of  
303 cooling were different than that typically used, the use of temporal X-ray imaging clearly  
304 shows that the freezing of tissues occurs from the inside of the bud and propagates to  
305 the outside, and that the freezing of bud tissues can last several minutes.

306           The non-destructive nature of X-ray phase contrast imaging is an interesting  
307 aspect for study of supercooling in buds, where damage to structure can result in loss of  
308 the phenotype (Quamme *et al.*, 1995). Although long-term survivorship of the buds was  
309 not tested, and radiation levels could potentially lead to cell death (Socha *et al.*, 2007;  
310 Sinclair *et al.*, 2009), buds that were imaged showed LTEs in comparable levels to  
311 those determined in standard DTA analysis (open vs. full symbols in Fig. 1,  
312 respectively). This demonstrates that at least for a few hours (scan for 3D imaging was  
313 ~1h, followed by the freezing scan) the buds remained viable, as dead buds show no, or  
314 much warmer, LTEs. This also demonstrates that the thermocouple probes in the  
315 needles are effective for the detection of exotherms related to cold hardiness of buds,  
316 and that placement of needles did not disrupt usual supercooling. The comparable LTE  
317 levels are very interesting considering two aspects: (i) the high rate of cooling used and  
318 (ii) the lack of observed high temperature exotherms (HTEs). The rate of cooling used in  
319 the cryostream was ~10x higher than that normally used in DTA – including DTA  
320 measurements used here to determine initial cold hardiness. The higher rate was  
321 required due to the time constraints for beam access, and faster freezing allowed us to  
322 image a greater number of buds. While the rates of cooling at the level used in this  
323 study reportedly cause a decrease in LTE temperature (more negative) of *V. vinifera*  
324 hybrid grapevines (Quamme, 1986), higher rates of cooling result in freezing at warmer  
325 temperatures for *Rhododendrum* sp. (Ishikawa and Sakai, 1981). We did not observe a  
326 particular trend when all species are taken into account. However, all the buds of *V.*  
327 *amurensis* froze at higher temperatures than the expected. This is likely a result of the  
328 over 2x greater rate of deacclimation this species has compared to the other two at low  
329 temperatures (Kovaleski *et al.*, 2018), and therefore storage may have resulted in some  
330 cold hardiness loss.

331           Needle probe data did not show any HTEs in terms of temperature deviations  
332 from the linear rate of cooling. There were also no visible cues or MS SSIM deviations  
333 relative to HTEs in buds in phase contrast imaging (Fig. 6, Supplementary Figure S1,  
334 Supplementary Videos S1–S3). In regular DTAs, HTEs are enhanced by the use of  
335 water sprays (Mills *et al.*, 2006), resulting in much larger peaks than LTEs. It is possible,  
336 however, that the HTE signal in non-wetted buds comes from the piece of cane

337 attached to the bud, rather than the extracellular space in the bud itself. This agrees  
338 with the report by Neuner *et al.* (2019) in the vast majority of the 37 species studied  
339 there was no ice within the buds even after HTE. HTEs may also be a result of  
340 condensation followed by freezing, or sublimation of water vapor on TEMs during the  
341 cooling in DTAs. The cryostream used in our setup has a ring of warmer, dry N<sub>2</sub> gas  
342 surrounding the N<sub>2</sub> cryostream, which prevents sublimation or condensation on the  
343 sample during the cooling. The possible HTE-corresponding signals seen were very  
344 slight lags in the temperature decrease (e.g., ~-10.0 °C in Supplementary Figure S1D).  
345 This behavior might indicate extra-organ freezing happens in grapevines, without  
346 extracellular ice forming within primordia such as described in other species (Quamme  
347 *et al.*, 1995; Endoh *et al.*, 2009, 2014). If the HTE happens in tissues further from the  
348 center of the bud, it is possible that the placing of the needle inserted could prevent or  
349 diminish the perception of temperature changes caused by tissues away from the center  
350 of the bud. However, LTEs corresponding to secondary buds were seen and measured  
351 based on temperature changes (Supplementary Figure S1D). The lack of HTE may also  
352 be an artifact of the high rate of cooling used as compared to regular DTA. However,  
353 LTEs measured were not far from expected values, and therefore HTEs may not be  
354 necessary for supercooling to occur. Further testing using multiple needles in buds  
355 should be conducted using different methods and rates of cooling to verify the  
356 occurrence, location, and importance of HTEs.

357 The resolution obtained in the freezing images of 2 μm pixel size was not enough  
358 to resolve ice crystals in the buds such as observed by Sinclair *et al.* (2009) imaging  
359 larvae of *Chymomyza amoena* and *Drosophila melanogaster*. Larvae have free lymph in  
360 large volumes, allowing the formation of large crystals within their bodies. In grapevine  
361 buds, most of the water is located inside cells with diameter less than 20 μm. While  
362 imaging at a higher resolution (~1 μm) is possible, increasing the resolution results in a  
363 smaller area of imaging (Verboven *et al.*, 2015) that would likely not fit a whole bud.  
364 Therefore, we assessed freezing as the movement resulting from volume expansion  
365 due to phase change in water, also observed by Sinclair *et al.* (2009).

366 Despite the cryostream hitting the bud from the top, possibly generating a small  
367 temperature gradient, freezing was directly observed to occur from the inside initially,

368 followed by outward progression in all species (Fig. 6, Supplementary Figure S1,  
369 Supplementary Videos S1–S3). Based on the MS SSIM, we can see the decay occurs  
370 earlier in the center portion vs. the top portion (Fig. 6, Supplementary Figure S1). This is  
371 also very clearly observed in Supplementary Video S2, where the *V. amurensis* bud  
372 scales located in the distal portion of the bud appear to be the last ones to freeze as  
373 they slightly unfold. This is a similar behavior to what was described by Quamme *et al.*  
374 (1995) for buds of peach (*Prunus persica*), in which ice propagates from the subtending  
375 tissues into the bud. Considering the apparent higher cold hardiness in bud scales  
376 compared to the shoot tip area, future studies exploring cold hardiness may want to  
377 compare these structures within the bud in terms of anatomy and gene expression.

378 Clear morphological differences are seen between the three species studied. *V.*  
379 *vinifera* has much less green (solid) tissue per bud volume than the other two species  
380 analyzed. Much of the bud volume is actually occupied by wool material (most visible in  
381 Fig. 3B and C). This adaptation is potentially linked to the region of origin: buds of *V.*  
382 *vinifera* likely had to adapt to reduce water loss during the dormant season in a warmer  
383 and drier place (Mediterranean) as compared to the areas where *V. amurensis* and *V.*  
384 *riparia* are native to (Northeastern Asia and North America, respectively). The  
385 differences in tissue of *V. amurensis* and *V. riparia* buds compared to *V. vinifera* also  
386 validate visible differences observed during budbreak. *V. riparia* has faster early  
387 development in the E-L scale compared to *V. vinifera*, even when responses to  
388 temperature are corrected (Kovaleski *et al.*, 2018). This may be a result of the larger  
389 volume of green tissue present in buds of *V. riparia* compared to *V. vinifera*. The  
390 implication of this observation is that there is less bud volume available for expanding  
391 tissues to fill in *V. riparia*, thus bud scales are forced open “earlier” in this species.  
392 Although it was not seen, *V. amurensis* would probably have similar or earlier budbreak  
393 than *V. riparia*, considering all of the tissues within the bud are extremely compacted  
394 and any expansion might result in appearance of early stages of budbreak (opening of  
395 the outer scales). It is not clear however how these morphological differences may  
396 implicate in greater maximum cold hardiness in *V. amurensis* and *V. riparia* compared  
397 to *V. vinifera* (Londo and Kovaleski, 2017).

398           The increase in volume is positively correlated with deacclimation, and faster  
399 increase of volume and deacclimation rates are seen in *V. amurensis* and *V. riparia* as  
400 compared to *V. vinifera* (Fig 1 and 5). This could indicate that increases in volume are  
401 reducing the ability of buds to supercool, likely as a result of influx of water leading to  
402 turgor (Xie *et al.*, 2018). Although it is not known how plants are able to control levels of  
403 deep supercooling, from a physical aspect it is known that larger volumes of water are  
404 at higher risk of ice nucleation at any given temperature (Bigg, 1953). Cold hardiness is  
405 correlated with bud water relations (Ishikawa and Sakai, 1981; Richards and Bliss,  
406 1986), and *V. vinifera* buds have an increase in ~25% water content from dormant to  
407 budbreak stage (Xie *et al.*, 2018; Meitha *et al.*, 2018). However, it is important to  
408 acknowledge that metabolic changes within the bud during deacclimation can also play  
409 a part in the loss of supercooling ability (Meitha *et al.*, 2018). The more rapid increase in  
410 volume in the later stages may be a result of re-establishment of vascular connections  
411 between the bud and the cane (Xie *et al.*, 2018). Newly developed xylem does not  
412 appear clearly such as large vessels in the cane, but the use of contrasting agents  
413 (Staedler *et al.*, 2013) could be used to evaluate the formation of xylem connections  
414 such as is done with dyes and light microscopy (Xie *et al.*, 2018). Contrasting agents  
415 may also be of potential use to more easily segment different parts of the bud in a  
416 virtual histology approach if differential uptake by tissues leads to clear density  
417 differences (Rousseau *et al.*, 2015), which could be tested in future assessments.

418           Buds took several minutes to completely freeze. This occurred despite the steep  
419 cooling rate and the cooling method based on a cryostream, which would reduce the  
420 difference in air to bud temperature by greatly decreasing the boundary layer (Grace,  
421 2006). This contradicts previous descriptions that the freezing that produces an LTE is  
422 sudden (Quamme, 1995), and lasts only a few seconds in buds of multiple species by  
423 Neuner *et al.* (2019) using infrared imaging for infrared DTA (IDTA). Because IDTA only  
424 observes the increase in temperature of the bud, propagating heat from the center of  
425 the bud to the outside would appear the same way as if ice was forming in those  
426 tissues. Indeed, our temperature probe data shows that the derivative of temperature  
427 measurements is only positive for a very brief period of time (Fig. 6D, Supplementary  
428 Figure S1D). However, both the MS SSIM (Fig. 6C, Supplementary Figure S1C) and

429 Supplementary Videos demonstrate that the wave of bud freezing lasts longer, even as  
430 the downward trend in the temperature measurements has resumed. Such downward  
431 trend in temperature would not appear in the images from IDTA, and therefore a great  
432 portion of the time for freezing is ignored. It is also important to note that the freezing of  
433 the secondary bud in *V. amurensis* (Supplementary Figure S1; Supplementary Video  
434 S2) appears to be a separate event entirely. This suggests that the freezing of  
435 secondary buds is protected from the primaries by a barrier that is not overcome by the  
436 propagation of ice that occurs upon initial freezing.

437         There was a difference in the time it took to completely freeze different buds. The  
438 size difference and amount of green tissue between species and development stages  
439 might justify why some buds froze more quickly compared to the other species if a  
440 similar rate of intracellular ice growth propagation is considered (Acker *et al.*, 2001).  
441 Although *V. amurensis* has buds with more volume than *V. vinifera*, it is possible that  
442 the wool in *V. vinifera* buds, as well as the shape of it reduced the rate of heat loss to  
443 the exterior. Energy balance studies comparing theoretical buds may allow for  
444 explanations for the differences in the duration of freezing. However, it is unlikely that  
445 insulation capabilities of bud tissues would be an adaptive response to increase cold  
446 hardiness, since air temperature changes in nature occur at a much lower rate and low  
447 temperature exposure lasts for longer periods of time.

448         X-ray microtomography proved to be a useful approach to identify structures  
449 within a bud, as well as for quantitative analysis of changes during loss of cold  
450 hardiness and early budbreak. Although our setup required removal of the bud from the  
451 cane, adaptation of a sample holder could lead to observation of growth in the same  
452 bud during development. Future explorations with contrasting agents (Staedler *et al.*,  
453 2013) may aid in anatomical studies, with special interest to water movement in the bud.  
454 High temperature exotherms were not visible or measurable, which indicates they may  
455 be an artifact of the larger sensors used in DTA. The use of 2D time-lapse X-ray phase  
456 contrast associated with a thermocouple was useful in identifying how ice spreads  
457 throughout the bud. We identified the differential response where the center of the bud  
458 is where ice nucleates and propagates from toward the scales, and showed that extra-  
459 organ freezing on scales or extracellular are not necessary for supercooling of buds of

460 different grapevine species. Finally, ice propagation observed by movement of tissues  
461 occurred over several minutes.

462

### 463 **Supplementary data**

464

465 **Fig. S1.** Characteristics of freezing in a bud of *Vitis amurensis* stored at 4 °C.

466 **Video S1.** X-ray phase contrast imaging of *Vitis riparia* bud during freezing.

467 **Video S2.** X-ray phase contrast imaging of *Vitis amurensis* bud during freezing.

468 **Video S3.** X-ray phase contrast imaging of *Vitis vinifera* bud during freezing.

469

### 470 **Acknowledgements**

471 This work is based upon research conducted at the Cornell High Energy Synchrotron  
472 Source (CHESS) which is supported by the National Science Foundation under award  
473 DMR-1332208. This work was partially supported by: CAPES, Coordenação de  
474 Aperfeiçoamento de Pessoal de Nível Superior, Brazil, award number 12945/13-7; by  
475 the National Science Foundation Plant Genome Research Program Award 1546869;  
476 and by an appointment to the Agricultural Research Service (ARS) Research  
477 Participation Program administered by the Oak Ridge Institute for Science and  
478 Education (ORISE) through an interagency agreement between the U.S. Department of  
479 Energy (DOE) and the U.S. Department of Agriculture (ORISE is managed by ORAU  
480 under DOE contract number DE-SC0014664). All opinions expressed in this paper are  
481 the authors' and do not necessarily reflect the policies and views of USDA, ARS, DOE,  
482 or ORAU|ORISE.

483



484 **References**

485

486 **Acker JP, Elliott JA, McGann LE.** 2001. Intercellular ice propagation: experimental  
487 evidence for ice growth through membrane pores. *Biophysical Journal* **81**: 1389–1397.

488

489 **Andreini L, Viti R, Scalabrelli G.** 2009. Study on the morphological evolution of bud  
490 break in *Vitis vinifera* L. *Vitis* **48**: 153–158.

491

492 **Andrews PK, Sandidge CR III, Toyama TK.** 1984. Deep supercooling of dormant and  
493 deacclimating *Vitis* buds. *American Journal of Enology and Viticulture* **35**: 175–177.

494

495 **Baier-Schenk A, Handschin S, von Schönau M, Bittermann AG, Bächli T, Conde-  
496 Petit B.** 2005. In situ observation of the freezing process in wheat dough by confocal  
497 laser scanning microscopy (CLSM): Formation of ice and changes in the gluten  
498 network. *Journal of Cereal Science* **42**: 255–260.

499

500 **Bauerecker S, Ulbig P, Buch V, Vrbka L, Jungwirth P.** 2008. Monitoring ice  
501 nucleation in pure and salty water via high-speed imaging and computer simulations.  
502 *Journal of Physical Chemistry C* **112**: 7631–7636.

503

504 **Bevilacqua A, Zaritzky NE, Calvelo A.** 1979. Histological measurements of ice in  
505 frozen beef. *Journal of Food Technology* **14**: 237–251.

506

507 **Bigg EK.** 1953. The supercooling of water. *Proceedings of the Physical Society.*  
508 *Section B* **66**: 688.

509

510 **Burke MJ, Gusta LV, Quamme HA, Weiser CJ, Li PH.** 1976. Freezing and injury in  
511 plants. *Annual Review of Plant Physiology* **27**: 507–528.

512

- 513 **Choat B, Badel E, Burlett R, Delzon S, Cochard H, Jansen S.** 2016. Noninvasive  
514 measurement of vulnerability to drought-induced embolism by X-ray microtomography.  
515 *Plant Physiology* **170**: 273–282.  
516
- 517 **Cochard H, Delzon S, Badel E.** 2015. X-ray microtomography (micro-CT): a reference  
518 technology for high-resolution quantification of xylem embolism in trees. *Plant, Cell &*  
519 *Environment* **38**: 201–206.  
520
- 521 **Coombe BG, Iland P.** 2005. Grapevine phenology. In Dry PR, Coombe BG, eds.  
522 *Viticulture*, vol 1: Resources. Winetitles, Ashford, Australia, 210–248.  
523
- 524 **Endoh K, Kasuga J, Arakawa K, Ito T, Fujikawa S.** 2009. Cryo-scanning electron  
525 microscopic study on freezing behaviors of tissue cells in dormant buds of larch (*Larix*  
526 *kaempferi*). *Cryobiology* **59**: 214–222.  
527
- 528 **Endoh K, Kuwabara C, Arakawa K, Fujikawa S.** 2014. Consideration of the reasons  
529 why dormant buds of trees have evolved extraorgan freezing as an adaptation for winter  
530 survival. *Environmental and Experimental Botany* **106**: 52–59.  
531
- 532 **Ferguson JC, Moyer MM, Mills LJ, Hoogenboom G, Keller M.** 2014. Modeling  
533 dormant bud cold hardiness and budbreak in twenty-three *Vitis* genotypes reveals  
534 variation by region of origin. *American Journal of Enology and Viticulture* **65**: 59–71.  
535
- 536 **Ferguson JC, Tarara JM, Mills LJ, Grove GG, Keller M.** 2011. Dynamic thermal time  
537 model of cold hardiness for dormant grapevine buds. *Annals of Botany* **107**: 389–396.  
538
- 539 **Grace J.** 2006. The temperature of buds may be higher than you thought. *New*  
540 *Phytologist* **170**: 1–3.  
541

- 542 **Guenther JF, Seki S, Kleinhans FW, Edashige K, Roberts DM, Mazur P.** 2006.  
543 Extra- and intra-cellular ice formation in Stage I and II *Xenopus laevis* oocytes.  
544 *Cryobiology* **52**: 401–416.  
545
- 546 **Ishikawa M, Price WS, Ide H, Arata Y.** 1997. Visualization of freezing behaviors in leaf  
547 and flower buds of full-moon maple by nuclear magnetic resonance microscopy. *Plant*  
548 *Physiology* **115**: 1515–1524.  
549
- 550 **Ishikawa M, Sakai A.** 1981. Freezing avoidance mechanisms by supercooling in some  
551 *Rhododendron* flower buds with reference to water relations. *Plant & Cell Physiology*  
552 **22**: 953–967.  
553
- 554 **Kerr WL, Kauten RJ, McCarthy MJ, Reid DS.** 1998. Monitoring the formation of ice  
555 during food freezing by magnetic resonance imaging. *LWT - Food Science and*  
556 *Technology* **31**: 215–220.  
557
- 558 **Koddenberg T, Militz H.** 2018. Morphological imaging and quantification of axial xylem  
559 tissue in *Fraxinus excelsior* L. through X-ray micro-computed tomography. *Micron* **111**:  
560 28–35.  
561
- 562 **Kovaleski AP, Reisch BI, Londo JP.** 2018. Deacclimation kinetics as a quantitative  
563 phenotype for delineating the dormancy transition and thermal efficiency for budbreak in  
564 *Vitis* species. *AoB PLANTS* doi:10.1093/aob-pla/ply066  
565
- 566 **Lang GA, Early JD, Martin GC, Darnell RL.** 1987. Endo-, para-, and ecodormancy:  
567 physiological terminology and classification for dormancy research. *HortScience* **22**:  
568 371–377.  
569
- 570 **Livingston DP 3rd, Tuong TD, Murphy JP, Gusta LV, Willick I, Wisniewski ME.**  
571 2018. High-definition infrared thermography of ice nucleation and propagation in wheat  
572 under natural frost conditions and controlled freezing. *Planta* **247**: 791–806.

- 573
- 574 **Londo JP, Johnson LM.** 2014. Variation in the chilling requirement and budburst rate  
575 of wild *Vitis* species. *Environmental and Experimental Botany* **106**: 138–147.
- 576
- 577 **Londo JP, Kovaleski AP.** 2017. Characterization of Wild North American Grapevine  
578 Cold Hardiness Using Differential Thermal Analysis. *American Journal of Enology and*  
579 *Viticulture* **68**: 203–212. doi: 10.5344/ajev.2016.16090
- 580
- 581 **Londo JP, Kovaleski AP.** 2019. Deconstructing cold hardiness: variation in  
582 supercooling ability and chilling requirements in the wild grapevine *Vitis riparia*.  
583 *Australian Journal of Grape and Wine Research*. doi: 10.1111/ajgw.12389
- 584
- 585 **Lowe D.** 2004. Distinctive image features from scale-invariant keypoints. *International*  
586 *Journal of Computer Vision* **60**: 91–110.
- 587
- 588 **Malek M, Khelfa H, Picart P, Mounier D, Poilâne C.** 2016. Microtomography imaging  
589 of an isolated plant fiber: a digital holographic approach. *Applied Optics* **55**: A111–21.
- 590
- 591 **Mayo SC, Chen F, Evans R.** 2010. Micron-scale 3D imaging of wood and plant  
592 microstructure using high-resolution X-ray phase-contrast microtomography. *Journal of*  
593 *Structural Biology* **171**: 182–188.
- 594
- 595 **Meitha K, Agudelo-Romero P, Signorelli S, Gibbs DJ, Considine JA, Foyer CH,**  
596 **Considine MJ.** 2018. Developmental control of hypoxia during bud burst in grapevine.  
597 *Plant, Cell & Environment* **41**: 1154–1170.
- 598
- 599 **Mills LJ, Ferguson JC, Keller M.** 2006. Cold-hardiness evaluation of grapevine buds  
600 and cane tissues. *American Journal of Enology and Viticulture* **57**: 194–200.
- 601
- 602 **Molisch H.** 1897. Untersuchungen über das Erfrieren der Pflanzen. Reprinted in  
603 English. 1982 in *Cryo-Letters* **3**:332-390.

604  
605 **Morris GJ, Coulson GE, Engels M.** 1986. A Cryomicroscopic Study of *Cylindrocystis*  
606 *brebissonii* De Bary and Two Species of *Micrasterias* Ralfs (Conjugatophyceae,  
607 Chlorophyta) during Freezing and Thawing. *Journal of Experimental Botany* **37**: 842–  
608 856.  
609  
610 **Nardini A, Savi T, Losso A, Petit G, Pacilè S, Tromba G, Mayr S, Trifilò P, Lo Gullo**  
611 **MA, Salleo S.** 2017. X-ray microtomography observations of xylem embolism in stems  
612 of *Laurus nobilis* are consistent with hydraulic measurements of percentage loss of  
613 conductance. *New Phytologist* **213**: 1068–1075.  
614  
615 **Neuner G, Monitzer K, Kaplenig D, Ingruber J.** 2019. Frost survival mechanism of  
616 vegetative buds in temperate trees: deep supercooling and extraorgan freezing vs. ice  
617 tolerance. *Frontiers in Plant Science* **10**: 537. doi: 10.3389/fpls.2019.00537  
618  
619 **Parker J.** 1963. Cold Resistance in Woody Plants. *The Botanical Review* **29**: 123–201.  
620  
621 **Pratt C.** 1971. Reproductive anatomy in cultivated grapes - a review. *American Journal*  
622 *of Enology and Viticulture* **22**: 92–109.  
623  
624 **Quamme HA.** 1986. Use of thermal analysis to measure freezing resistance of grape  
625 buds. *Canadian Journal of Plant Science* **66**: 947–952.  
626  
627 **Quamme HA.** 1995. Deep supercooling in buds of woody plants. In: *Biological ice*  
628 *nucleation and its applications.* 183–199.  
629  
630 **Quamme HA, Su WA, Veto LJ.** 1995. Anatomical features facilitating supercooling of  
631 the flower within the dormant peach flower bud. *Journal of the American Society for*  
632 *Horticultural Science* **120**: 814–822.  
633

- 634 **Richards JH, Bliss LC.** 1986. Winter water relations of a deciduous timberline conifer,  
635 *Larix laricina* Parl. *Oecologia* **69**: 16–24.  
636
- 637 **Rousseau D, Widiez T, Di Tommaso S, Rositi H, Adrien J, Maire E, Langer M,**  
638 **Olivier C, Peyrin F, Rogowsky P.** 2015. Fast virtual histology using X-ray in-line phase  
639 tomography: application to the 3D anatomy of maize developing seeds. *Plant Methods*  
640 **11**: 55.  
641
- 642 **Schindelin J, Arganda-Carreras I, Frise E *et al.*** 2012. Fiji: an open-source platform  
643 for biological-image analysis. *Nature methods* **9**: 676–682. doi: 10.1038/nmeth.2019  
644
- 645 **Scoffoni C, Albuquerque C, Brodersen CR, Townes SV, John GP, Cochard H,**  
646 **Buckley TN, McElrone AJ, Sack L.** 2017. Leaf vein xylem conduit diameter influences  
647 susceptibility to embolism and hydraulic decline. *New Phytologist* **213**: 1076–1092.  
648
- 649 **Sedighi Gilani M, Boone MN, Mader K, Schwarze FWMR.** 2014. Synchrotron X-ray  
650 micro-tomography imaging and analysis of wood degraded by *Physisporinus vitreus* and  
651 *Xylaria longipes*. *Journal of Structural Biology* **187**: 149–157.  
652
- 653 **Sinclair BJ, Gibbs AG, Lee W-K, Rajamohan A, Roberts SP, Socha JJ.** 2009.  
654 Synchrotron x-ray visualisation of ice formation in insects during lethal and non-lethal  
655 freezing. *PloS one* **4**: e8259.  
656
- 657 **Socha JJ, Westneat MW, Harrison JF, Waters JS, Lee W-K.** 2007. Real-time phase-  
658 contrast x-ray imaging: a new technique for the study of animal form and function. *BMC*  
659 *Biology* **5**: 6.  
660
- 661 **Staedler YM, Masson D, Schönenberger J.** 2013. Plant tissues in 3D via X-ray  
662 tomography: simple contrasting methods allow high resolution imaging. *PloS one* **8**:  
663 e75295.  
664

- 665 **Stott SL, Karlsson JOM.** 2009. Visualization of intracellular ice formation using high-  
666 speed video cryomicroscopy. *Cryobiology* **58**: 84–95.  
667
- 668 **Torres-Ruiz JM, Jansen S, Choat B *et al.*** 2015. Direct x-ray microtomography  
669 observation confirms the induction of embolism upon xylem cutting under tension. *Plant*  
670 *Physiology* **167**: 40–43.  
671
- 672 **Verboven P, Herremans E, Helfen L, Ho QT, Abera M, Baumbach T, Wevers M,**  
673 **Nicolaï BM.** 2015. Synchrotron X-ray computed laminography of the three-dimensional  
674 anatomy of tomato leaves. *the plant journal* **81**: 169–182.  
675
- 676 **Wang Z, Bovik AC, Sheikh HR, Simoncelli EP.** 2004. Image quality assessment:  
677 From error visibility to structural similarity. *IEEE Transactions on Image Processing* **13**:  
678 600–612.  
679
- 680 **Wisniewski M, Lindow SE, Ashworth EN.** 1997. Observations of ice nucleation and  
681 propagation in plants using infrared video thermography. *Plant Physiology* **113**: 327–  
682 334. doi: 10.1104/pp.113.2.327.  
683
- 684 **Workmaster BAA, Palta JP.** 1999. Ice nucleation and propagation in cranberry  
685 uprights and fruit using infrared video thermography. *Journal of the American Society*  
686 *for Horticultural Science* **124**: 619–625.  
687
- 688 **Xie Z, Forney CF, Bondada B.** 2018. Renewal of vascular connections between  
689 grapevine buds and canes during bud break. *Scientia Horticulturae* **233**: 331–338.

690 **Figure and Video Legends**

691

692 **Figure 1.** Deacclimation of *Vitis amurensis*, *V. riparia*, and *V. vinifera* ‘Riesling’ under  
693 forcing conditions. Full symbols represent average bud cold hardiness estimated  
694 through differential thermal analysis (DTA), while open symbols represent freezing  
695 temperature of single buds under a cryostream. Error bars represent standard deviation  
696 of the mean. Deacclimation rates (linear regression) were 2.24 °C day<sup>-1</sup> (R<sup>2</sup>= 0.89),  
697 2.12 °C day<sup>-1</sup> (R<sup>2</sup>= 0.92), and 1.33 °C day<sup>-1</sup> (R<sup>2</sup>= 0.95) for *V. amurensis*, *V. riparia*, and  
698 *V. vinifera*, respectively (*P*<0.001 for all), at 22 °C and 16h/8h light/dark.

699

700 **Figure 2.** Development of *Vitis riparia* buds during budbreak reconstructed using X-ray  
701 microtomography. Buds shown were imaged at 0 (A), 2 (B), 8 (C), 11 (D), and 13 (E)  
702 days under forcing conditions. Full arrow heads indicate inflorescences, asterisks  
703 indicate secondary and tertiary bud. Scale bar = 1 mm (all images are in the same  
704 scale).

705

706 **Figure 3.** Development of *Vitis vinifera* buds during budbreak reconstructed using X-ray  
707 microtomography. Buds shown were imaged at 0 (A), 2 (B), 8 (C), and 13 (D) days  
708 under forcing conditions. Full arrow heads indicate inflorescences, open arrow head  
709 indicates apical meristem, asterisks indicate secondary and tertiary bud. Scale bar = 1  
710 mm (all images are in the same scale).

711

712 **Figure 4.** Development of *Vitis amurensis* buds during budbreak reconstructed using X-  
713 ray microtomography. Buds shown were imaged at 0 (A), 2 (B), and 5 (C) days under  
714 forcing conditions. Full arrow heads indicate inflorescences, open arrow head indicates  
715 apical meristem, asterisks indicate secondary and tertiary bud. Scale bar = 1 mm (all  
716 images are in the same scale).

717

718 **Figure 5.** Increase in volume ( $\Delta V$ ) of *Vitis amurensis*, *V. riparia*, and *V. vinifera* during  
719 deacclimation. Volume was determined by counting the number of voxels in X-ray  
720 microtomography-reconstructed buds, therefore not including air space.  $\Delta V$  was



721 calculated as the percent increase in volume from sample (or average of samples) at  
722 day 0.

723  
724 **Figure 6.** Characteristics of freezing in a bud of *Vitis riparia* after 11 days of  
725 deacclimation (see Supplementary Video S1). (A) Still image of bud at start of freezing;  
726 Black (whole image), magenta (top of the bud), and cyan (center of the bud) show areas  
727 analyzed; dashed line through center of the bud shows pixels used to build kymograph.  
728 (B) Kymograph resulting from line of pixels in the center of the bud; arrows show the  
729 start of freezing; asterisk marks the outer bud scale that moves inward. (C) Normalized  
730 multi-scale structural similarity index (MS SSIM) for three areas in (A); dashed box is  
731 shown expanded in the inset, dotted line marks the start of freezing event. (D)  
732 Temperature profile measured by thermocouple inside the bud; dotted line marks the  
733 start of freezing event.

734  
735 *Supplementary data*

736  
737 **Figure S1.** Characteristics of freezing in a bud of *Vitis amurensis* stored at 4 °C (see  
738 Supplementary Video S2). (A) Still image of bud at start of freezing; Black (whole  
739 image), magenta (top of the bud), and cyan (center of the bud) show areas analyzed;  
740 dashed line through center of the bud shows pixels used to build kymograph. (B)  
741 Kymograph resulting from line of pixels in the center of the bud; arrows show the start of  
742 freezing. (C) Normalized multi-scale structural similarity index (MS SSIM) for three  
743 areas in (A); dashed box is shown expanded in the inset, dotted line marks the start of  
744 freezing event. (D) Temperature profile measured by thermocouple inside the bud;  
745 dotted line marks the start of freezing event, open arrowhead shows slight lag, closed  
746 arrowhead shows secondary bud exotherm.

747  
748 **Video S1.** X-ray phase contrast imaging of *Vitis riparia* bud during freezing. Bud had  
749 been exposed to forcing conditions for 11 days (same bud from Figs. 2D and 6). Time  
750 stamp on the left in mm:ss format. Expected (blue background, lower) and measured  
751 (red background, upper) temperatures in the bud. Expected temperature was calculated

752 based on linear regression of inner bud temperature during cooling while freezing did  
753 not occur. Freezing begins at  $-9.4\text{ }^{\circ}\text{C}$  / 28:41.

754

755 **Video S2.** X-ray phase contrast imaging of *Vitis amurensis* bud during freezing. Bud  
756 had not experienced forcing conditions (same bud from Figure 4A). Time stamp on the  
757 left in mm:ss format. Expected (blue background, lower) and measured (red  
758 background, upper) temperatures in the bud. Expected temperature was calculated  
759 based on linear regression of inner bud temperature during cooling while freezing did  
760 not occur. Freezing begins at  $-17.5\text{ }^{\circ}\text{C}$  / 22:10.

761

762 **Video S3.** X-ray phase contrast imaging of *Vitis vinifera* bud during freezing. Bud had  
763 been exposed to forcing conditions for 2 days (same bud from Figure 3B). Time stamp  
764 on the left in mm:ss format. Expected (blue background, lower) and measured (red  
765 background, upper) temperatures in the bud. Expected temperature was calculated  
766 based on linear regression of inner bud temperature during cooling while freezing did  
767 not occur. Freezing begins at  $-18.3\text{ }^{\circ}\text{C}$  / 33:30.

768

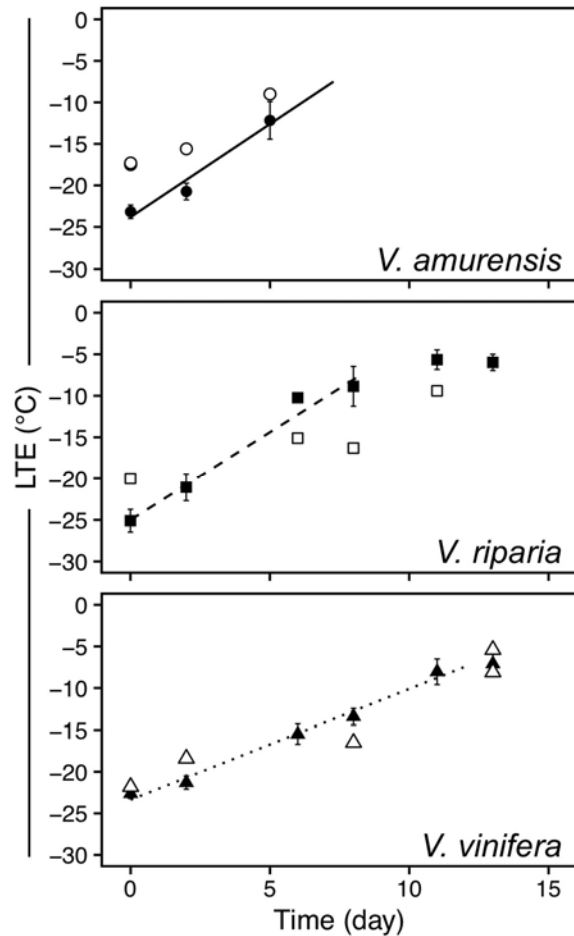

769  
770 **Figure 1.** Deacclimation of *Vitis amurensis*, *V. riparia*, and *V. vinifera* ‘Riesling’ under  
771 forcing conditions. Full symbols represent average bud cold hardiness estimated  
772 through differential thermal analysis (DTA), while open symbols represent freezing  
773 temperature of single buds under a cryostream. Error bars represent standard deviation  
774 of the mean. Deacclimation rates (linear regression) were  $2.24\text{ }^{\circ}\text{C day}^{-1}$  ( $R^2= 0.89$ ),  
775  $2.12\text{ }^{\circ}\text{C day}^{-1}$  ( $R^2= 0.92$ ), and  $1.33\text{ }^{\circ}\text{C day}^{-1}$  ( $R^2= 0.95$ ) for *V. amurensis*, *V. riparia*, and  
776 *V. vinifera*, respectively ( $P<0.001$  for all), at  $22\text{ }^{\circ}\text{C}$  and 16h/8h light/dark.

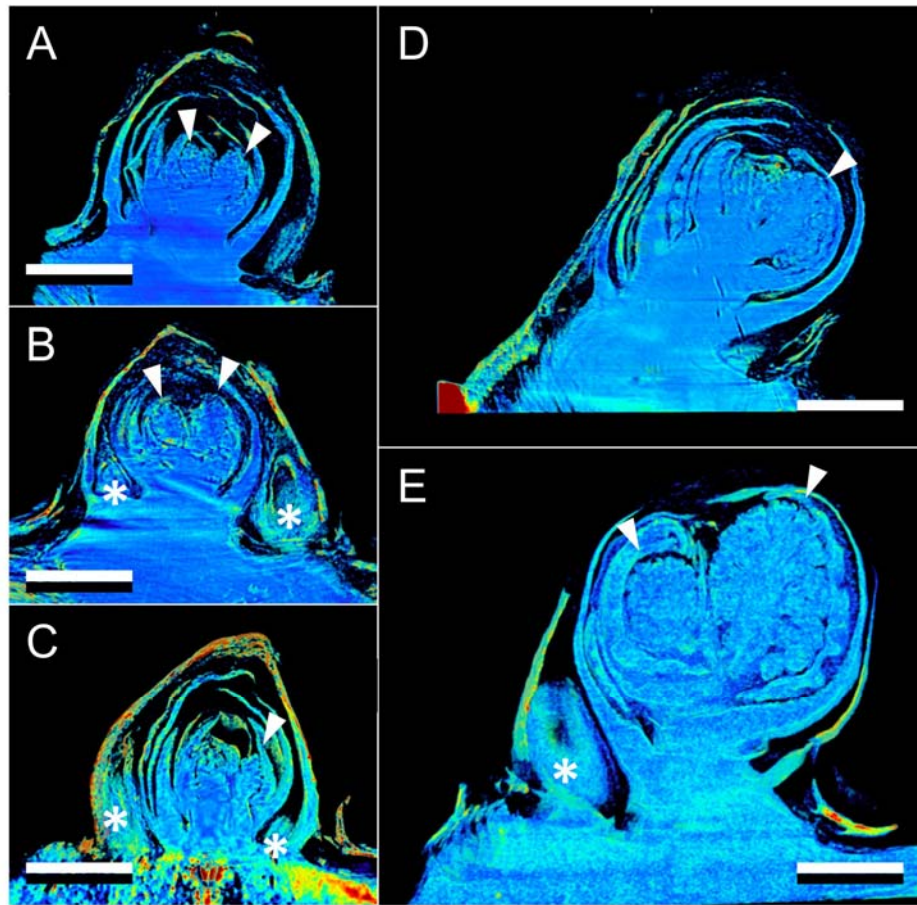

777  
778 **Figure 2.** Development of *Vitis riparia* buds during budbreak reconstructed using X-ray  
779 microtomography. Buds shown were imaged at 0 (A), 2 (B), 8 (C), 11 (D), and 13 (E)  
780 days under forcing conditions. Full arrow heads indicate inflorescences, asterisks  
781 indicate secondary and tertiary bud. Scale bar = 1 mm (all images are in the same  
782 scale).  
783

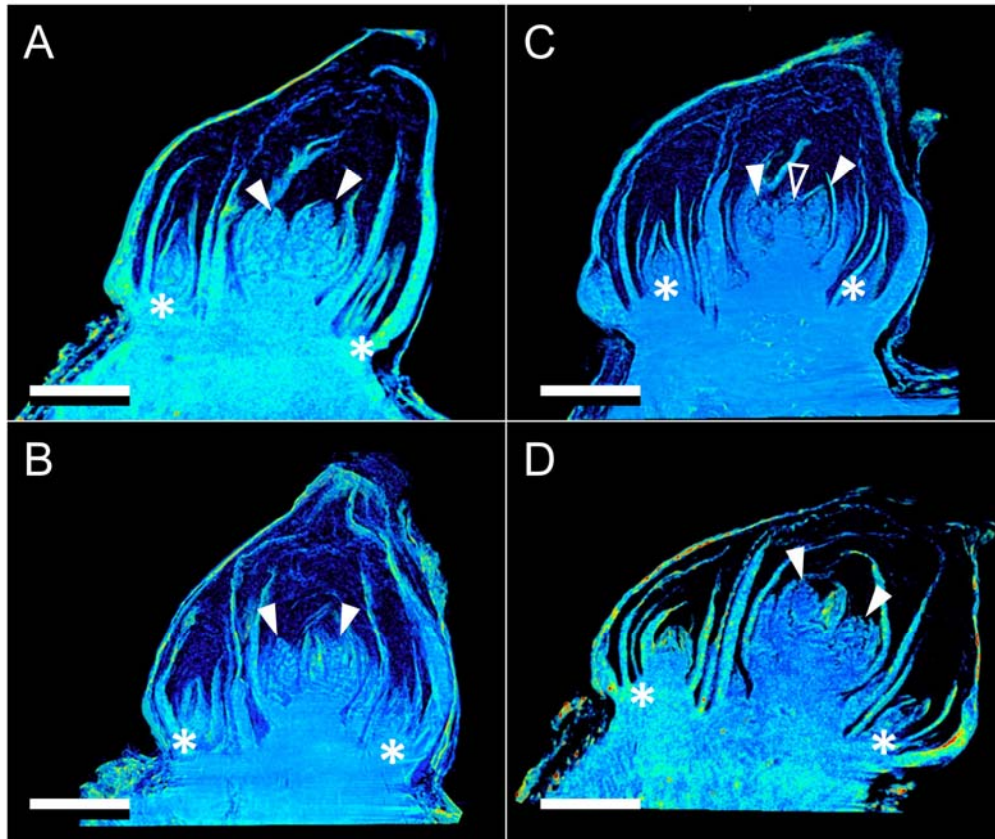

784

785 **Figure 3.** Development of *Vitis vinifera* buds during budbreak reconstructed using X-ray  
786 microtomography. Buds shown were imaged at 0 (A), 2 (B), 8 (C), and 13 (D) days  
787 under forcing conditions. Full arrow heads indicate inflorescences, open arrow head  
788 indicates apical meristem, asterisks indicate secondary and tertiary bud. Scale bar = 1  
789 mm (all images are in the same scale).

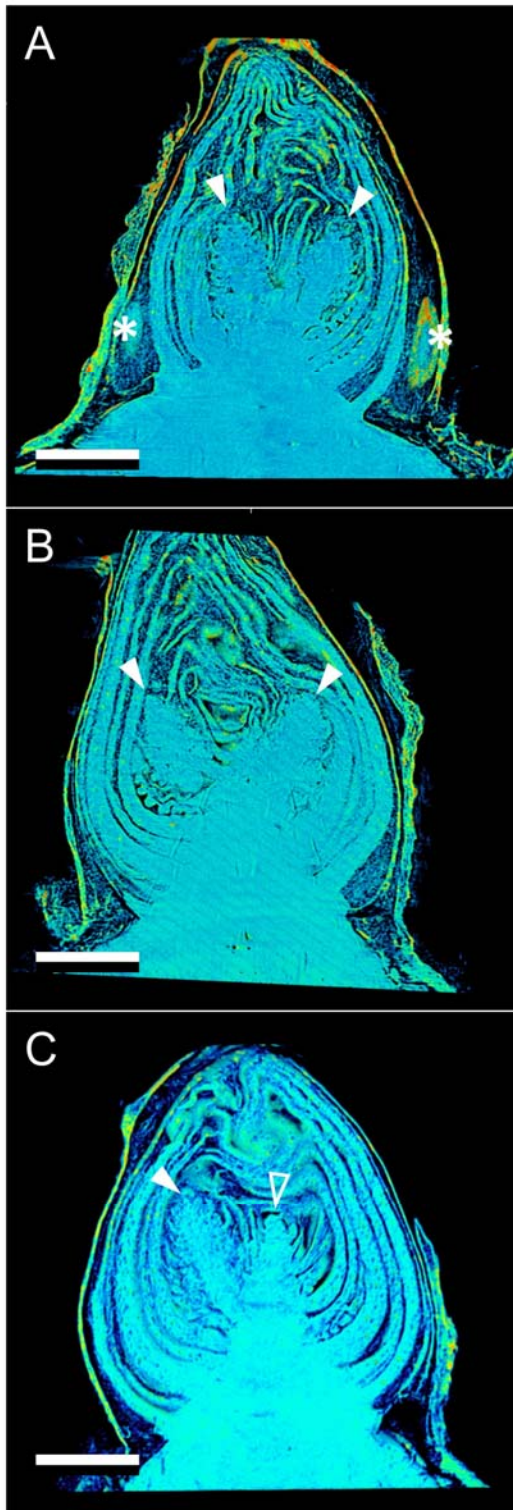

**Figure 4.** Development of *Vitis amurensis* buds during budbreak reconstructed using X-ray microtomography. Buds shown were imaged at 0 (A), 2 (B), and 5 (C) days under forcing conditions. Full arrow heads indicate inflorescences, open arrow head indicates apical meristem, asterisks indicate secondary and tertiary bud. Scale bar = 1 mm (all images are in the same scale).

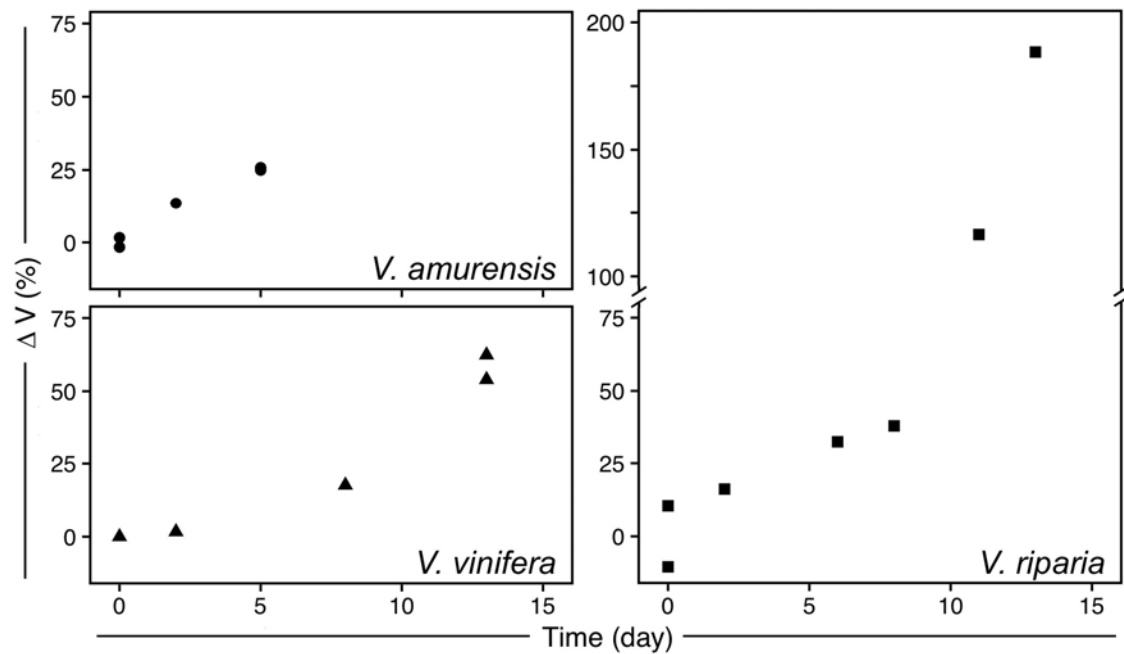

803  
804 **Figure 5.** Increase in volume ( $\Delta V$ ) of *Vitis amurensis*, *V. riparia*, and *V. vinifera* during  
805 deacclimation. Volume was determined by counting the number of voxels in X-ray  
806 microtomography-reconstructed buds, therefore not including air space.  $\Delta V$  was  
807 calculated as the percent increase in volume from sample (or average of samples) at  
808 day 0.  
809

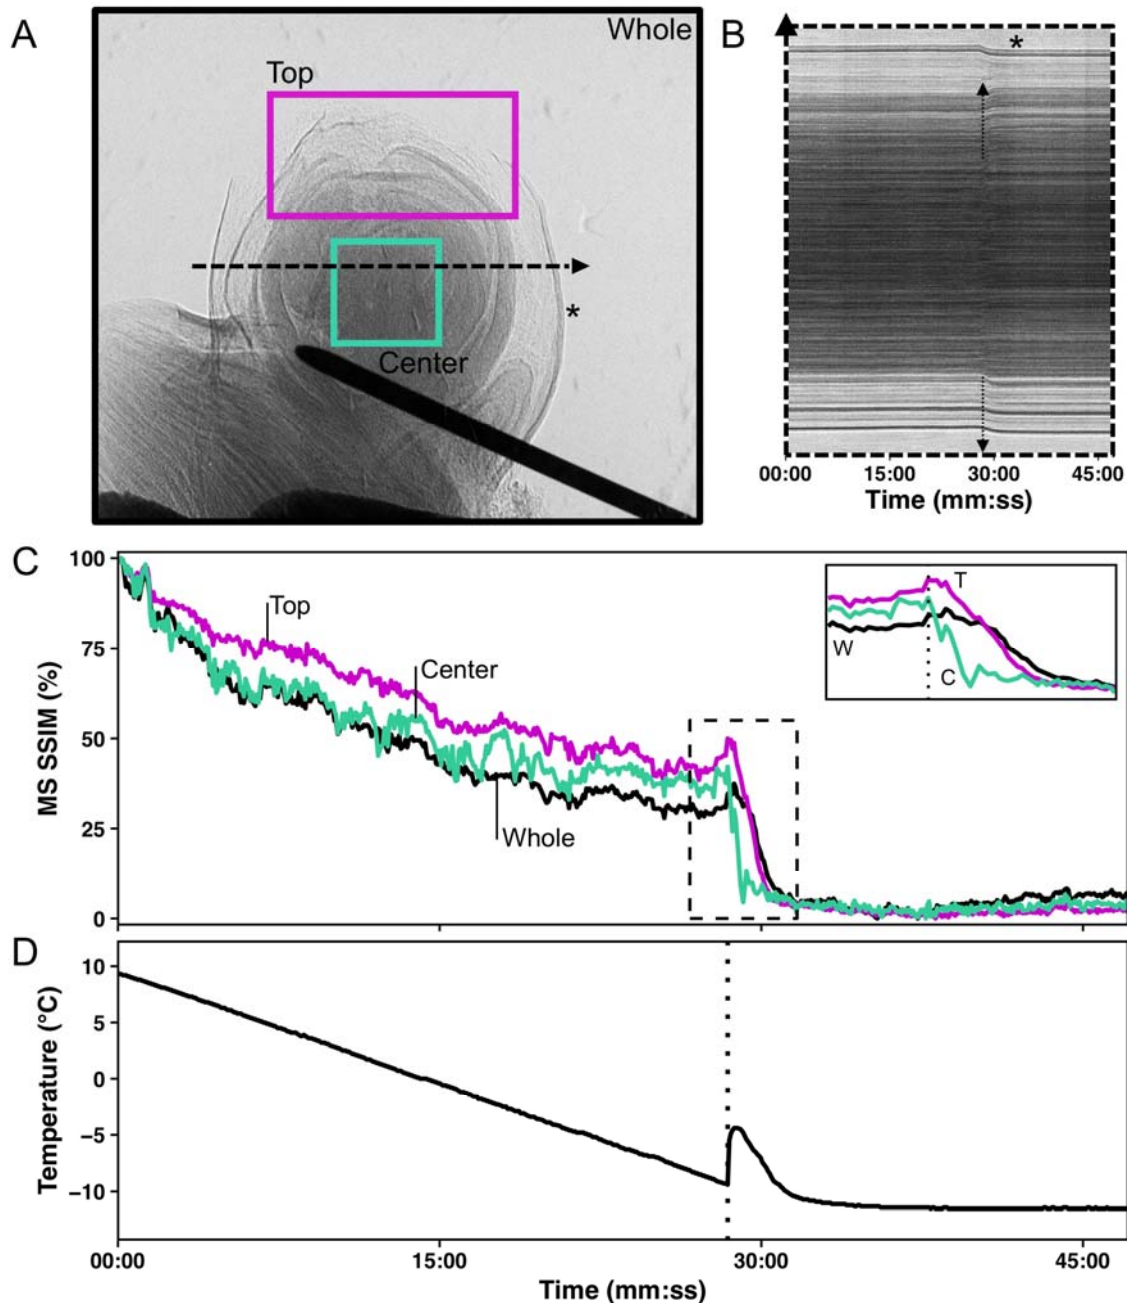

810

811 **Figure 6.** Characteristics of freezing in a bud of *Vitis riparia* after 11 days of deacclimation (see  
812 Supplementary Video S1). (A) Still image of bud at start of freezing; Black (whole image),  
813 magenta (top of the bud), and cyan (center of the bud) show areas analyzed; dashed line  
814 through center of the bud shows pixels used to build kymograph. (B) Kymograph resulting from  
815 line of pixels in the center of the bud; arrows show the start of freezing; asterisk marks the outer  
816 bud scale that moves inward. (C) Normalized multi-scale structural similarity index (MS SSIM)  
817 for three areas in (A); dashed box is shown expanded in the inset, dotted line marks the start of  
818 freezing event. (D) Temperature profile measured by thermocouple inside the bud; dotted line  
819 marks the start of freezing event.



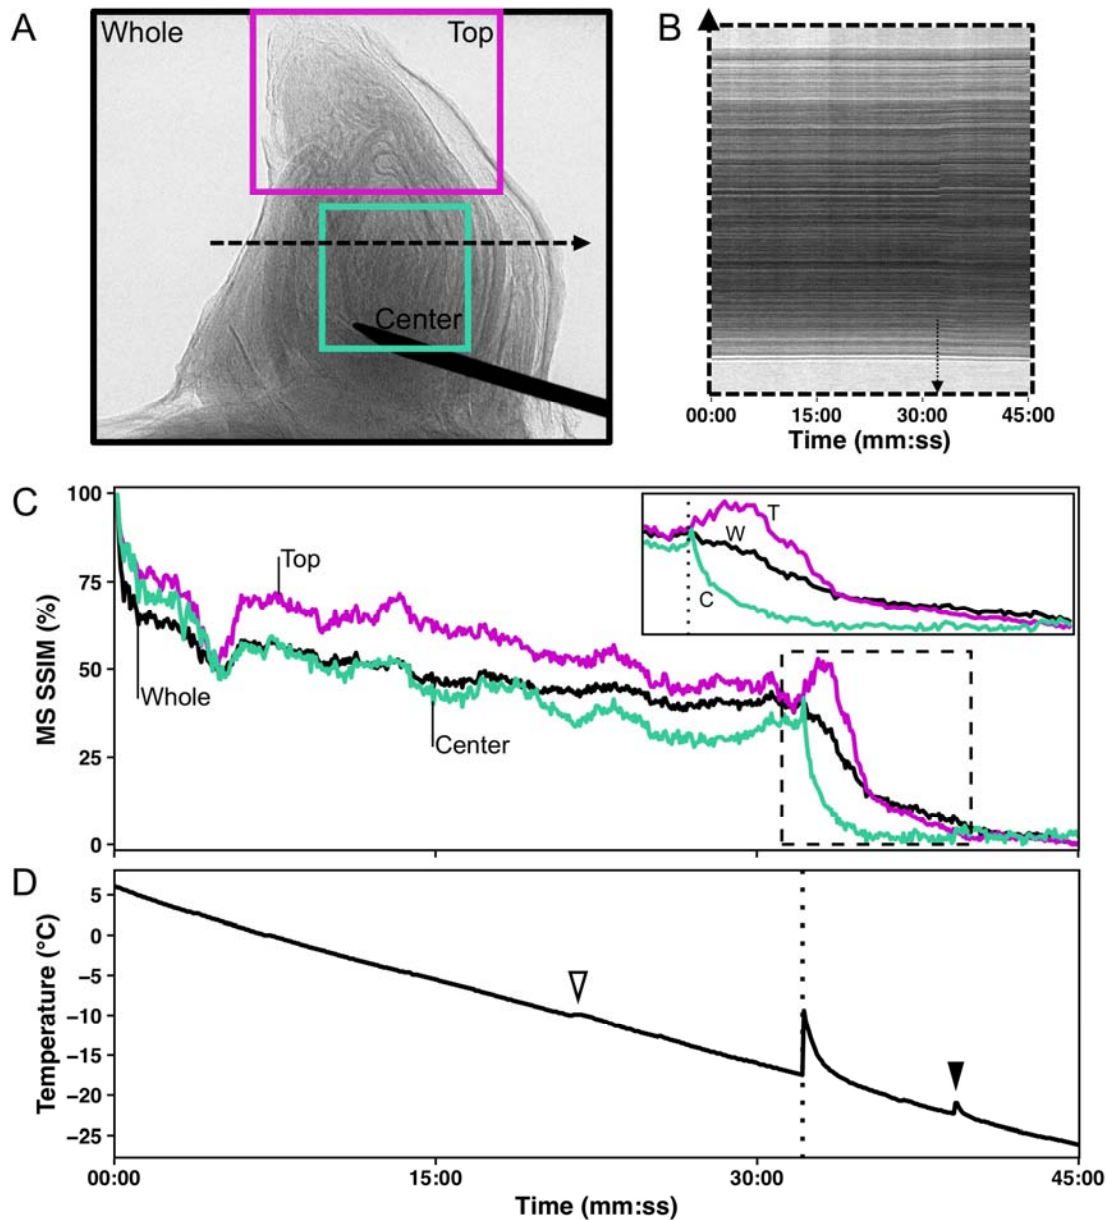

Source: http://biorxiv.org/content/10.1101/647248v1.full.pdf
